# Supplementary material
Source: publisher figshare collection journal article supplement (https://gsajournals.figshare.com/ndownloader/files/15112091)
Supplement: Supplementary file 1 [file 15112091]

## Sheet: Sheet1
Screen	failed	failedGB	M1s	M2s	S1s	S2s	rho1s	rho2s	M1GBs	M2GBs	S1GBs	S2GBs	rho1GBs	rho2GBs
Ase1	1	1	-0.0770276	0.00373971	0.365856	0.073865	0.100472	0.899528	-0.0434695	0.00183032	0.361423	0.0762764	0.101051	0.898949
Cdc11	0	0	-0.00616597	0.186266	0.103872	0.68314	0.881846	0.118154	-0.00392984	0.212982	0.106333	0.669216	0.891265	0.108735
Cop1	0	0	-0.00291713	0.182428	0.0690489	0.402551	0.861422	0.138578	-0.000358644	0.207884	0.0730317	0.417304	0.87095	0.12905
Dad2	1	1	-0.000177543	0.0131234	0.049145	0.212293	0.816331	0.183669	-0.00136572	0.0460225	0.049173	0.201652	0.809244	0.190756
Heh2	0	0	-0.0095423	0.642735	0.105169	0.797584	0.885221	0.114779	-0.00574161	0.692054	0.107664	0.789861	0.869217	0.130783
Hta2	0	0	-0.00311471	0.151778	0.0399525	0.322525	0.866598	0.133402	-0.00349522	0.200737	0.0414103	0.342956	0.85888	0.14112
Iqg1	1	1	-0.00286571	0.0427897	0.0941268	0.326812	0.82159	0.17841	0.000561458	0.0646101	0.098024	0.317382	0.828292	0.171708
Loa1	0	0	-0.00764174	0.148128	0.0965031	0.34361	0.737645	0.262355	-0.00479738	0.183531	0.0938104	0.339224	0.726307	0.273693
Nop10	0	0	-0.00508817	0.123876	0.0682526	0.328784	0.827774	0.172226	-0.00377033	0.186332	0.0744474	0.357224	0.849781	0.150219
Nuf2	0	0	-0.00270551	0.224162	0.0786184	0.462297	0.885899	0.114101	-0.00115133	0.307831	0.0822597	0.507455	0.884984	0.115016
Nup53	1	1	-0.0141852	0.00069752	0.209254	0.048004	0.138585	0.861415	-0.00120389	0.0156662	0.0474648	0.188368	0.864505	0.135495
Om45	0	0	-0.00408751	0.292512	0.075714	0.557026	0.891466	0.108534	-0.00256509	0.410168	0.0779588	0.569367	0.880928	0.119072
Pil1	0	0	-0.0048738	0.273936	0.0667639	0.556614	0.889279	0.110721	-0.00364368	0.391012	0.0681716	0.588355	0.881622	0.118378
Psr1	0	0	-0.00521315	0.353901	0.0652171	0.52885	0.896014	0.103986	-0.00506968	0.420254	0.0675494	0.552955	0.878673	0.121327
Pus1	1	1	-0.00048811	0.0253206	0.0584441	0.362625	0.886906	0.113094	-0.000846976	0.0459622	0.06421	0.421495	0.895567	0.104433
Rad52	1	0	-0.000944978	0.0269408	0.0452012	0.271415	0.864506	0.135494	-0.000461781	0.0788975	0.0478521	0.283889	0.867755	0.132245
Sac6	0	0	-0.0040844	0.224047	0.0848308	0.576156	0.919123	0.0808771	-0.003934	0.355406	0.0866604	0.653368	0.925611	0.0743887
Sec3	1	0	-0.000603546	0.0603099	0.0507088	0.217015	0.83541	0.16459	-6.15541e-05	0.086555	0.0515193	0.224007	0.843134	0.156866
Sec7	0	0	-0.00901452	0.247138	0.0859211	0.524204	0.837771	0.162229	-0.00538756	0.349359	0.0858878	0.544134	0.827611	0.172389
Sec63	0	0	-0.00697037	0.31418	0.0563197	0.438396	0.848793	0.151207	-0.00529918	0.381414	0.0598644	0.438806	0.817916	0.182084
SKL	1	1	-0.00357631	0.059279	0.0586644	0.22466	0.873616	0.126384	-0.00199719	0.0351959	0.0538973	0.178223	0.815894	0.184106
Vph1	0	0	-0.00401833	0.139021	0.0521069	0.320071	0.872037	0.127963	-0.00252499	0.181059	0.0518769	0.330944	0.857895	0.142105
Vps35	0	0	-0.00132027	0.181274	0.055973	0.428949	0.893217	0.106783	0.00397769	0.281131	0.0612671	0.448725	0.891062	0.108938
